# Supplementary material
Source: publisher figshare collection journal article supplement (https://acs.figshare.com/ndownloader/files/12066662)
Supplement: Supplementary file 1 [file 12066662]

---

**A Stable Layered Semiconductive Cu(I)–Organic Framework for  
Efficient Visible-Light-Driven Cr(VI) Reduction and H<sub>2</sub> Evolution**

Di-Ming Chen, Chun-Xiao Sun, Chun-Sen Liu\* and Miao Du\*

College of Material and Chemical Engineering, Zhengzhou University of Light Industry,  
Zhengzhou 450002, P. R. China.

Authors for correspondence: chunsenliu@zzuli.edu.cn; dumiao@zzuli.edu.cn.

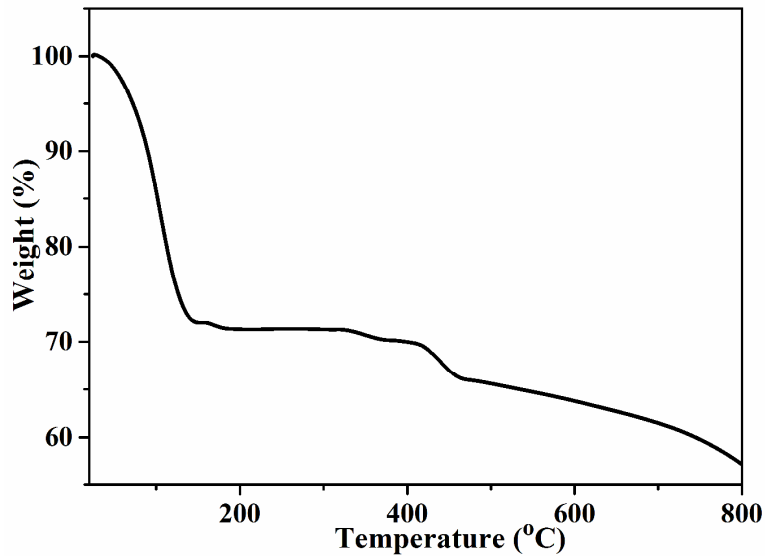

**Figure S1.** The TGA curve for **1**.

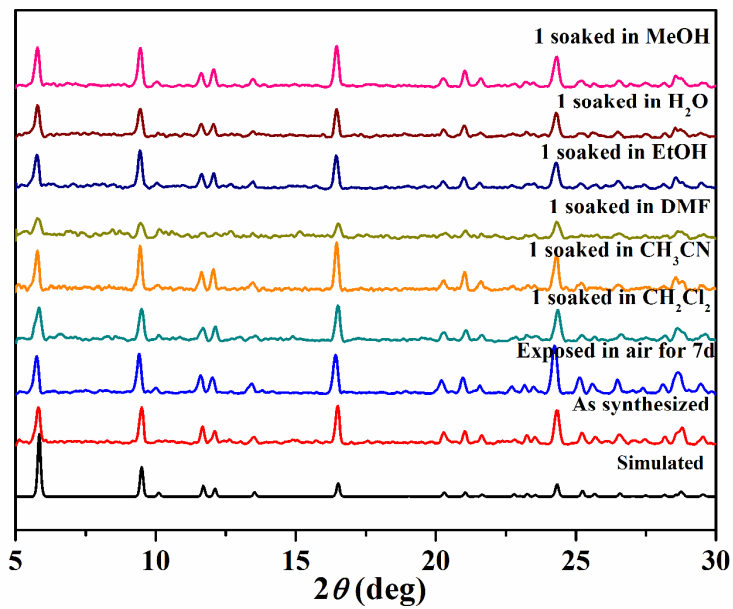

**Figure S2.** The PXRD patterns of **1** under different conditions.

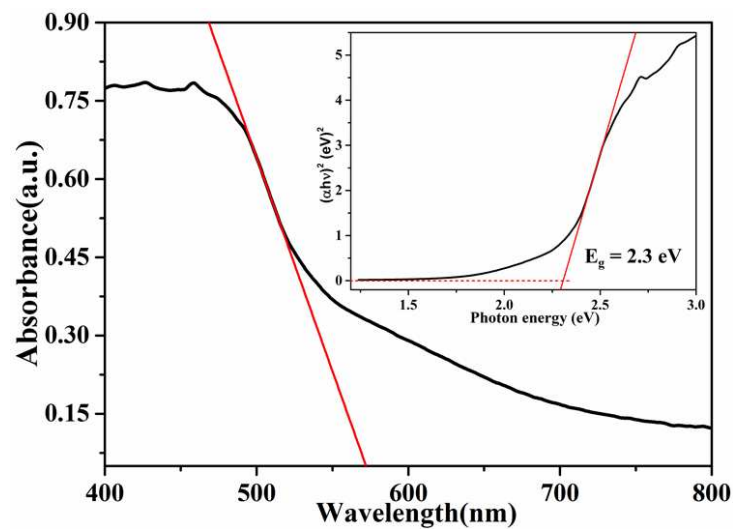

**Figure S3.** UV–Vis spectrum of the BPEA ligand (The inset show the plot of  $(\alpha h\nu)^2$  versus photon energy ( $h\nu$ ) of the BPEA ligand).

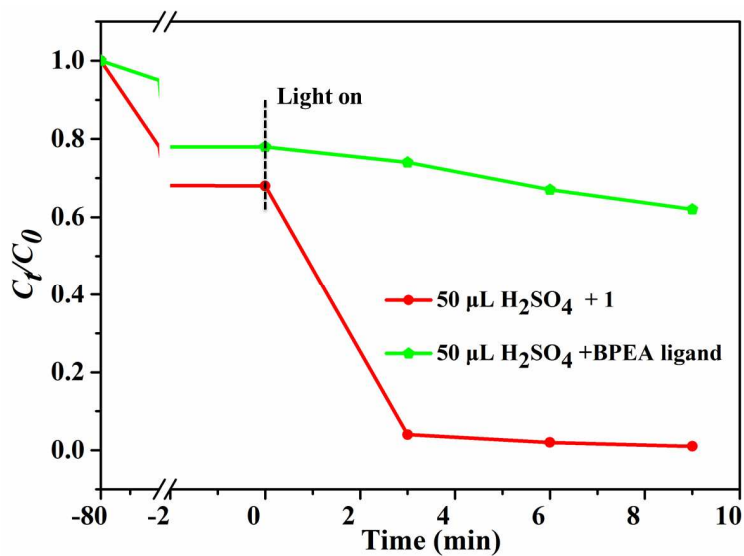

**Figure S4.** A comparison study of the photocatalytic reduction of Cr(VI) over **1** and BPEA ligand under the same condition.

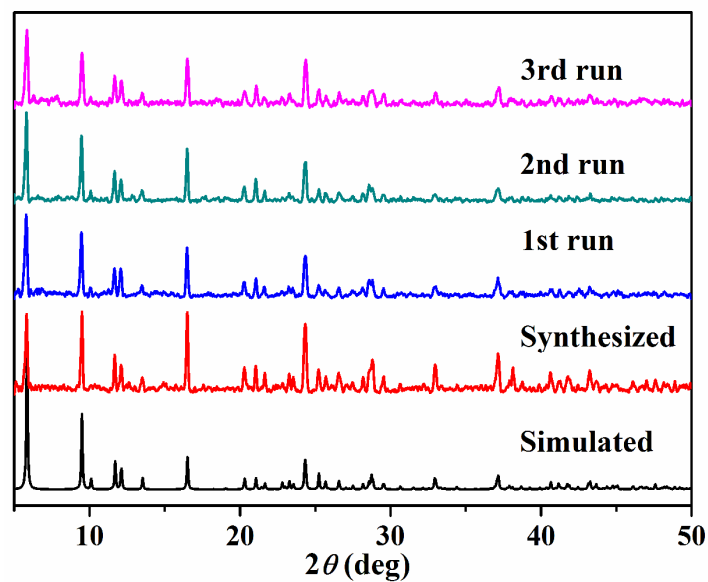

**Figure S5.** The PXRD patterns of **1** in the three cycles of photocatalytic reduction of Cr(VI) processes.

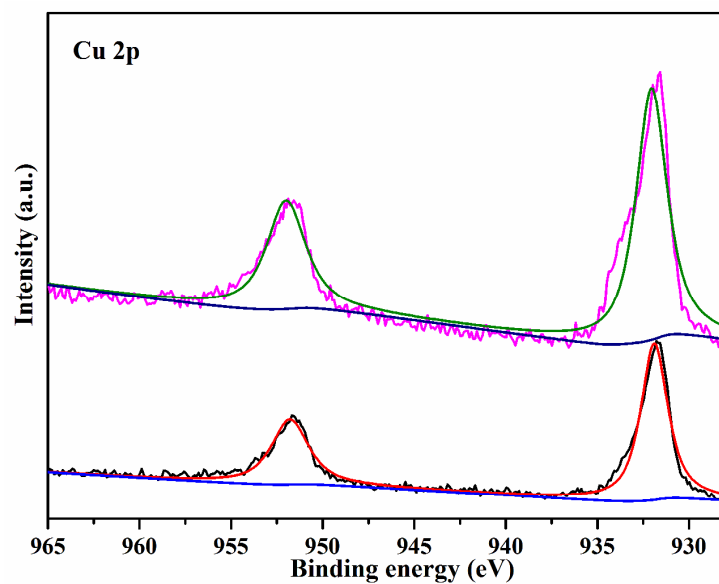

**Figure S6.** XPS of Cu in **1** before and after photocatalytic reduction of Cr(VI) processes.

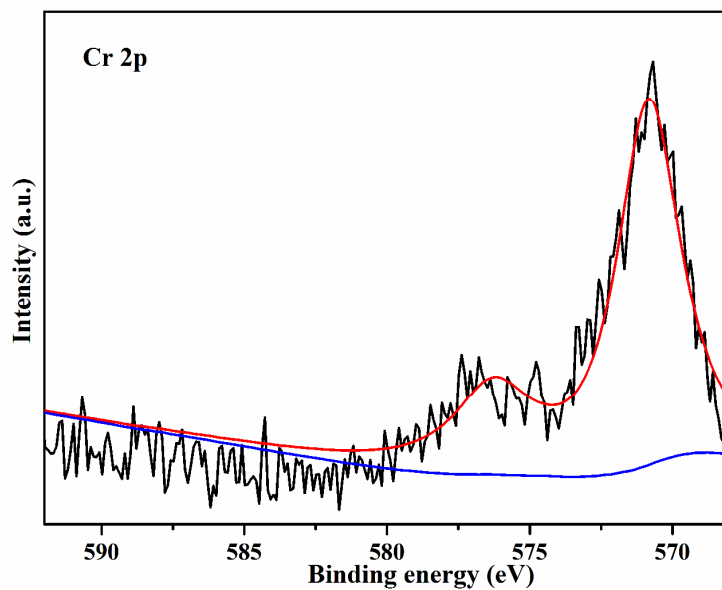

**Figure S7.** XPS of Cr in **1** after photocatalytic reduction of Cr(VI) processes.

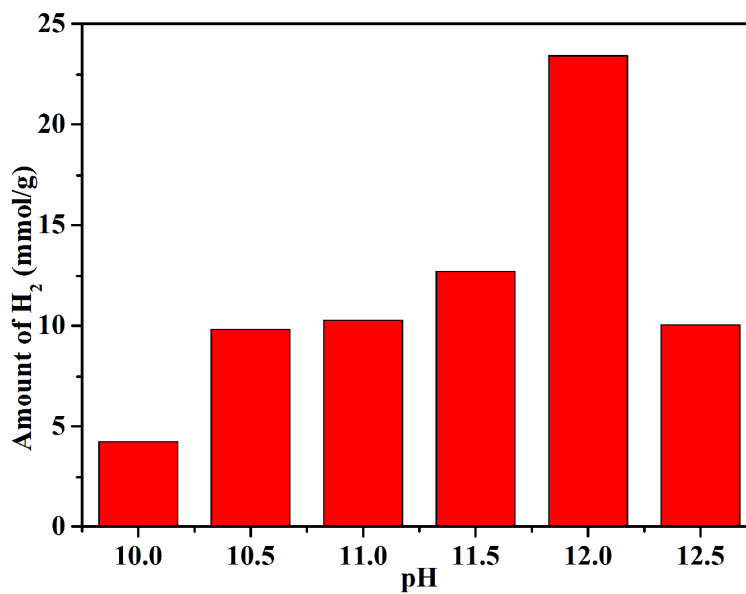

**Figure S8.** The photocatalytic H<sub>2</sub> evolution amount of **1** in five hours under different pH values.

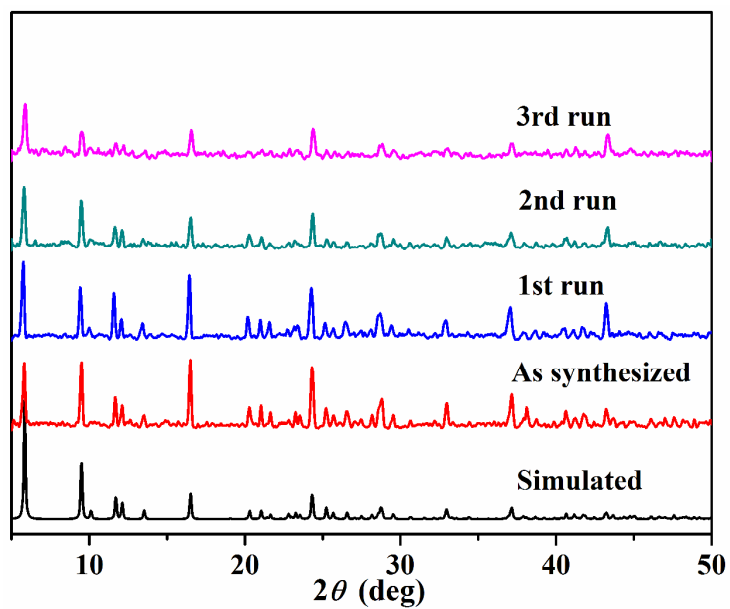

**Figure S9.** The PXRD patterns of **1** in the three cycles of photocatalytic H<sub>2</sub> evolution processes.

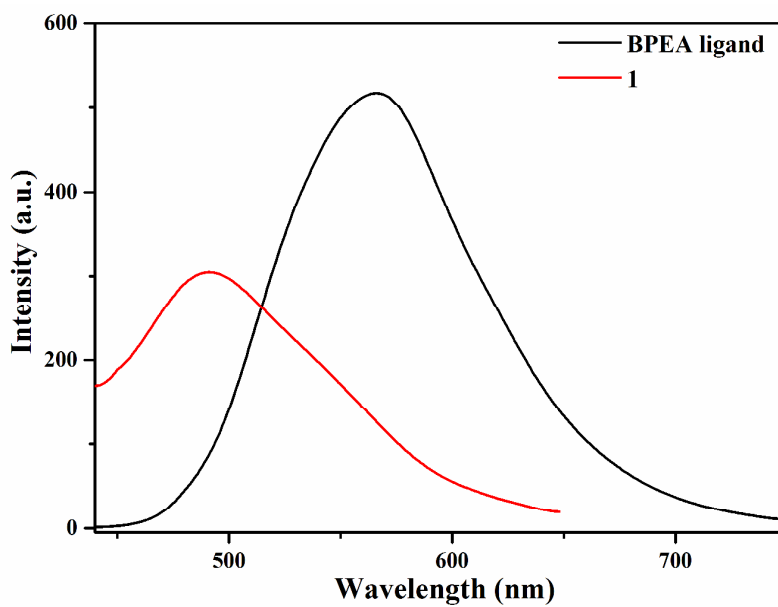

**Figure S10.** The solid-state PL spectra for BPEA ligand and **1**.
